# Supplementary material for: Sulphur- and Selenium-for-Oxygen Replacement as a Strategy to Obtain Dual Type I/Type II Photosensitizers for Photodynamic Therapy
Source: MDPI journal article supplement (doi:10.3390/molecules28073153), 2023-04-01
Supplement: s1 [file s1]

# **Sulphur- and Selenium-for-Oxygen Replacement as a Strategy to Obtain Dual TypeI/TypeII Photosensitizers for Photodynamic Therapy**

**Mario Prejanò , Marta Erminia Alberto \* , Bruna Clara De Simone, Tiziana Marino , Marirosa Toscano and Nino Russo \***

*Dipartimento di Chimica e Tecnologie Chimiche, Università della Calabria, 87036 Arcavacata di Rende, CS, Italy.*

Figure S1: Frontiers Molecular Orbital Plots.....pag.S2

Figure S2: Main Vertical singlet and triplet excitation energies,  $\lambda$  (nm),  $\Delta E$  (eV), oscillator strength  $f$  and Natural Transition Orbitals involved.....pag.S3

Figure S3. Energy diagram of the main singlet and triplet states.....pag.S5

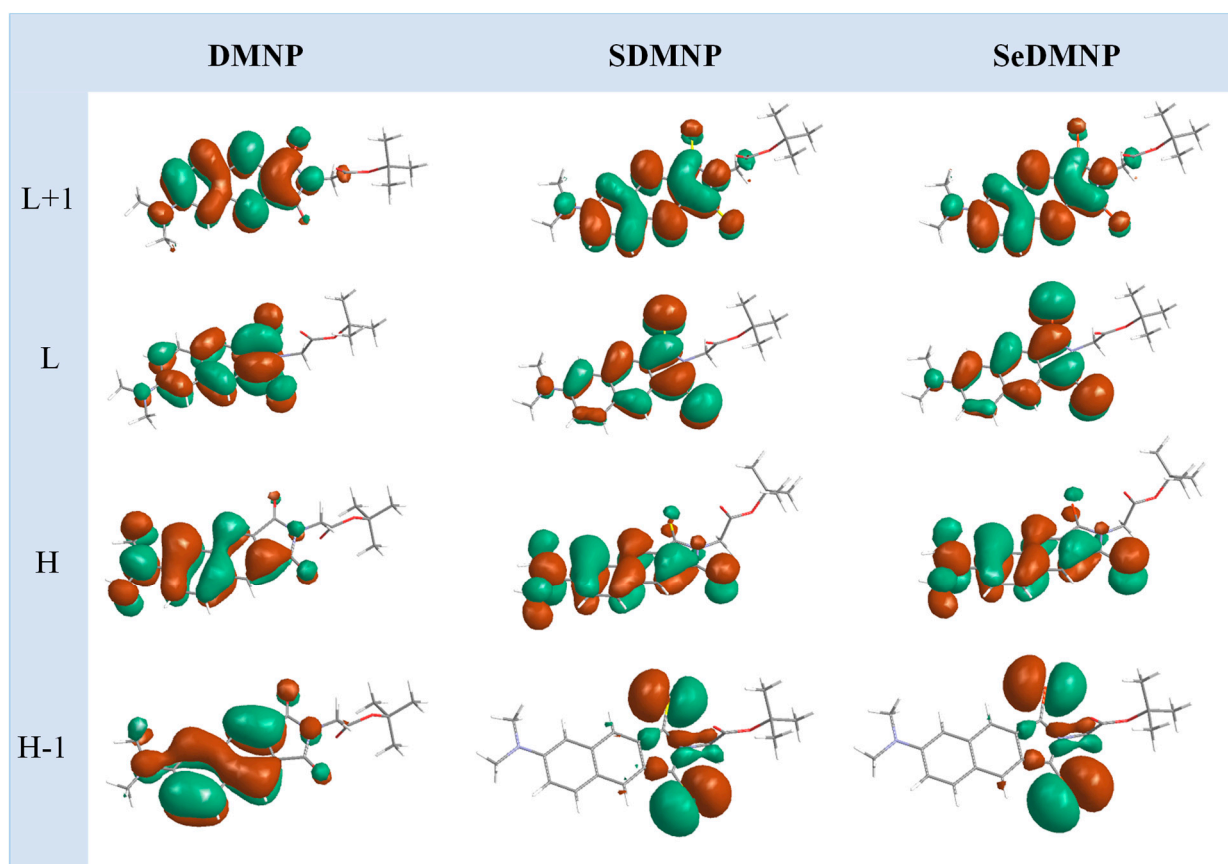

Figure S1: Frontiers Molecular Orbital Plots

| State Composition |       | $\lambda$ | $\Delta E$ | f     | Natural Transition Orbitals (NTOs)                                                   |
|-------------------|-------|-----------|------------|-------|--------------------------------------------------------------------------------------|
| DMNP              |       |           |            |       |                                                                                      |
| S <sub>1</sub>    | H→L   | 449       | 2.76       | 0.135 | 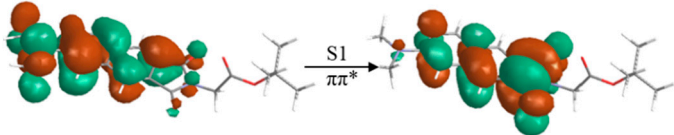   |
| S <sub>2</sub>    | H→L+1 | 388       | 3.20       | 0.304 |    |
| T <sub>1</sub>    | H→L   | 548       | 2.26       | /     |   |
| T <sub>2</sub>    | H-1→L | 493       | 2.51       | /     |  |
| SDMNP             |       |           |            |       |                                                                                      |
| S <sub>1</sub>    | H→L   | 603       | 2.05       | 0.303 |  |
| T <sub>1</sub>    | H→L   | 867       | 1.43       | /     |  |
| T <sub>2</sub>    | H-1→L | 626       | 1.98       | /     |  |
| SeDMNP            |       |           |            |       |                                                                                      |

|                      |       |      |      |       |                                                                                    |
|----------------------|-------|------|------|-------|------------------------------------------------------------------------------------|
| <b>S<sub>1</sub></b> | H-1→L | 682  | 1.82 | 0.000 | 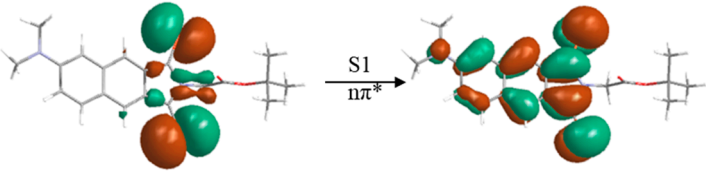 |
| <b>S<sub>2</sub></b> | H→L   | 645  | 1.92 | 0.333 |  |
| <b>T<sub>1</sub></b> | H→L   | 1001 | 1.24 | /     |  |
| <b>T<sub>2</sub></b> | H-1→L | 787  | 1.58 | /     |  |

Figure S2: Main Vertical singlet and triplet excitation energies,  $\lambda$  (nm),  $\Delta E$  (eV), oscillator strength  $f$  and Natural Transition Orbitals involved, for DMNP, SDMNP and SeDMNP in DMSO at TD-DFT/B3LYP/6-31+G(d,p) level of theory.

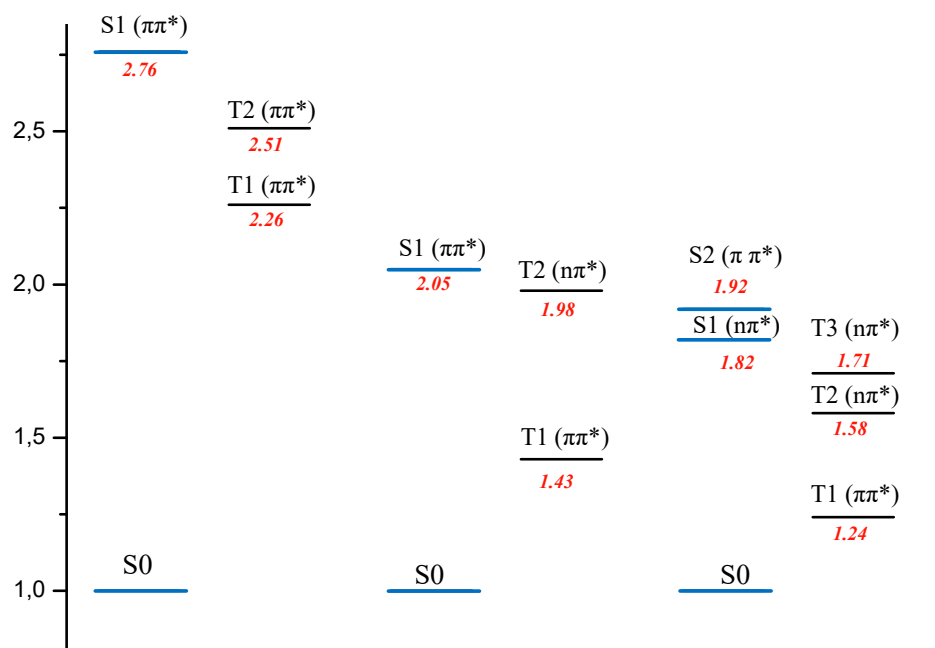

Figure S3. Energy diagram of the main singlet and triplet states.
